# Supplementary material
Source: PubMed Central journal article supplement (PMC3936587)

## SUPPLEMENTARY DATA

Fig. S1. Frequency histograms of vessel diameters in deep and shallow roots of *Q. fusiformis* and *S. lanuginosum*. Vessel diameters were used to calculate root theoretical conductivity.

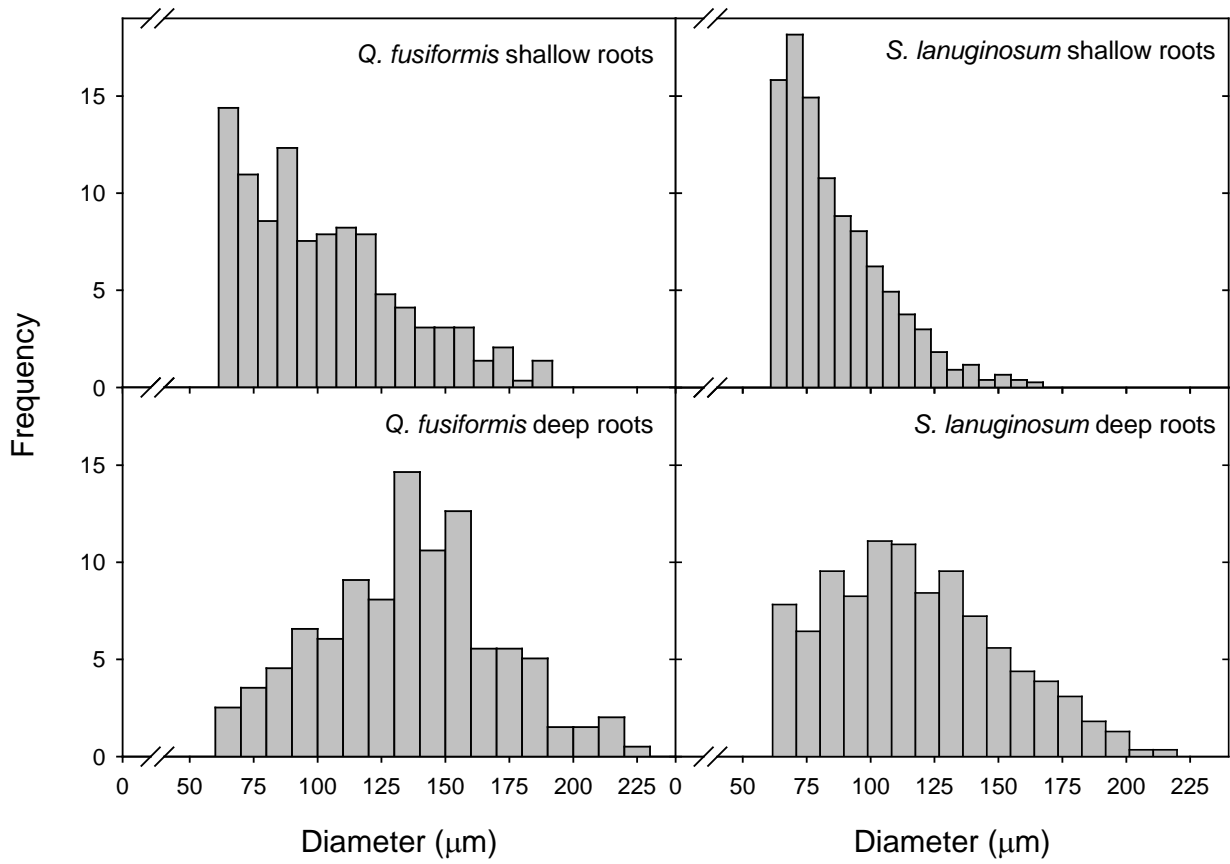

Supplement: supp_mct294_mct294supp.pdf [file supp_mct294_mct294supp.pdf]
